# Supplementary figures and images for: Mapping and Functional Analysis of QTL for Kernel Number per Row in Tropical and Temperate–Tropical Introgression Lines of Maize (Zea mays L.)
Source: MDPI journal article supplement (doi:10.3390/cimb45050281), 2023-05-18

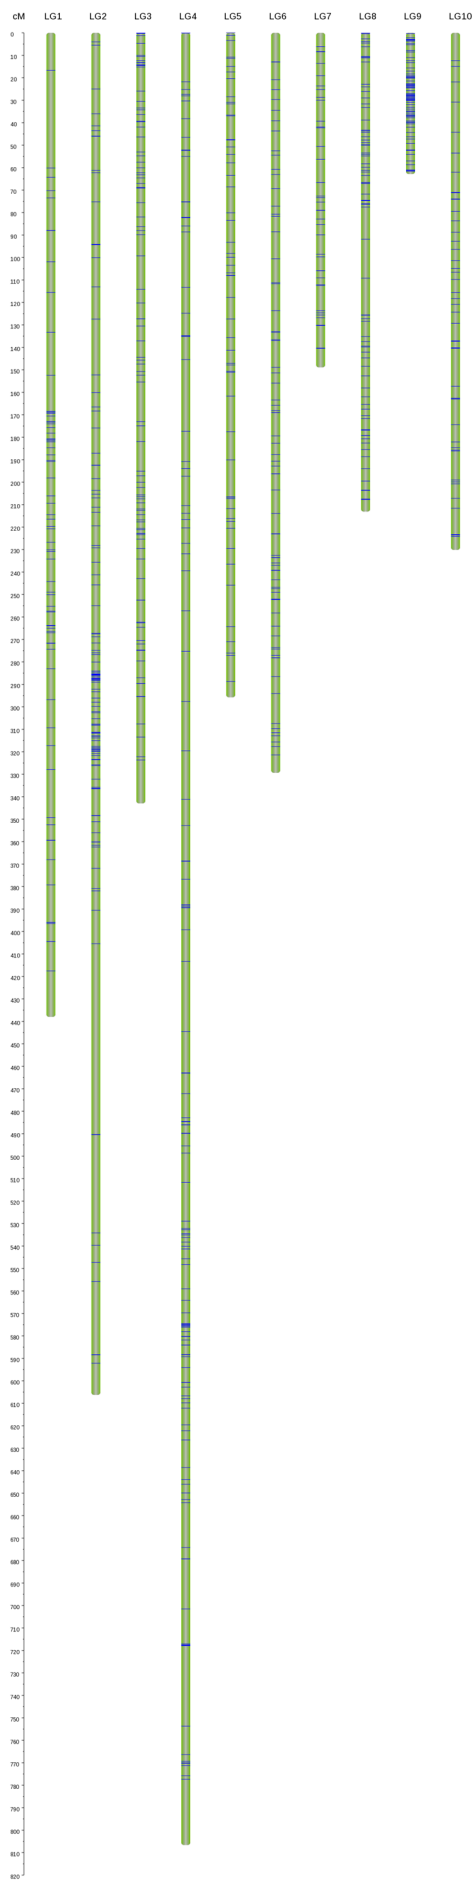

**Figure S2.** Genetic map of pop2.

Supplement: s1 [file s1]

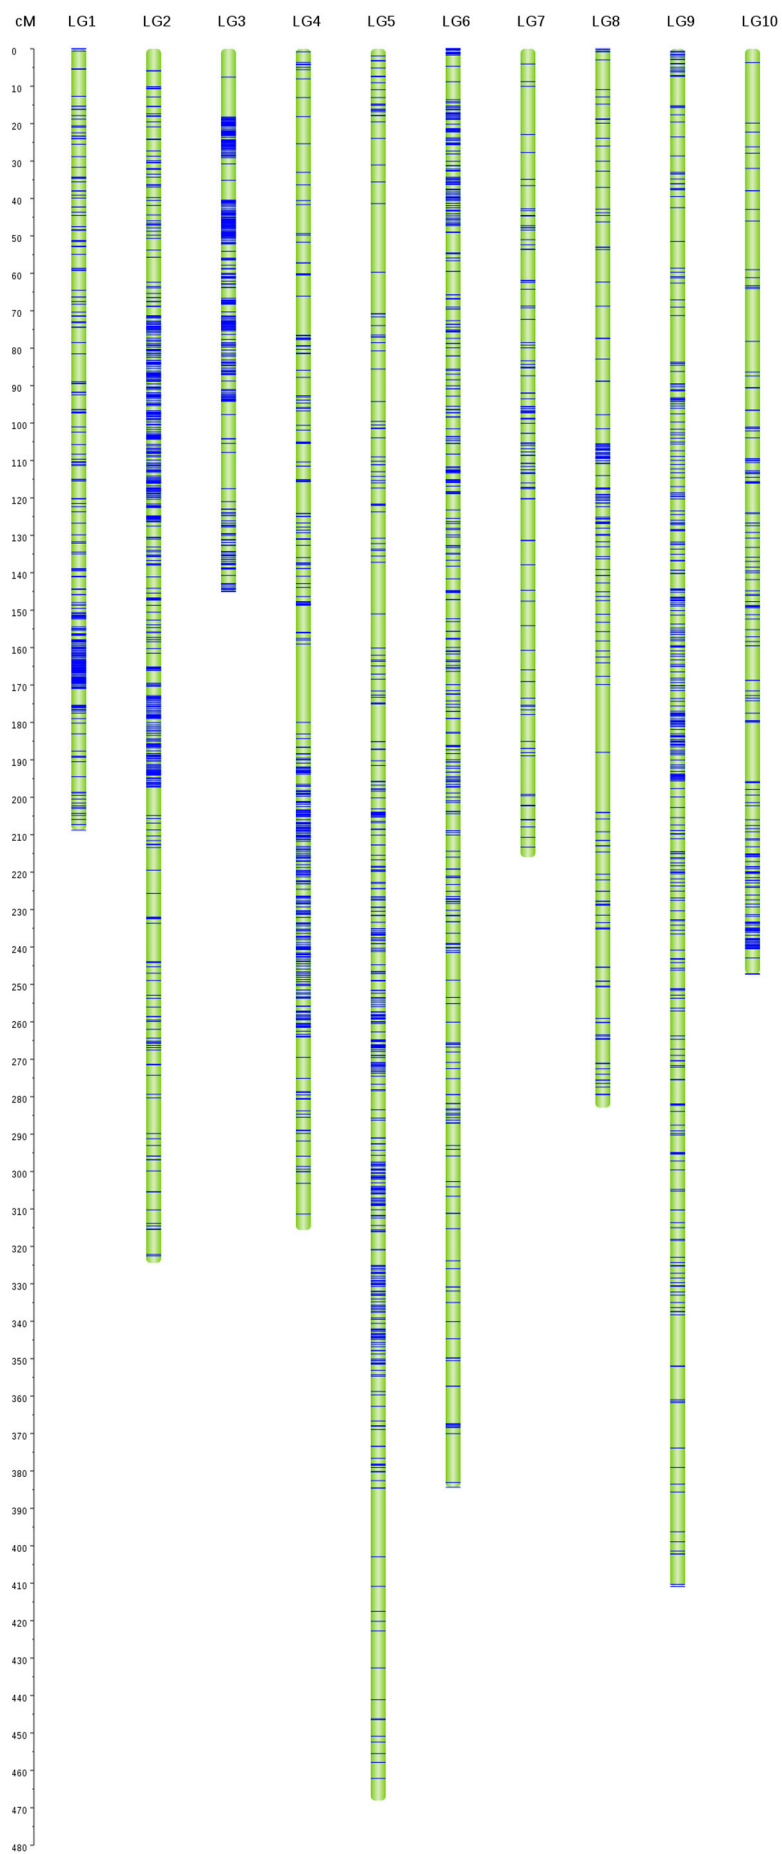

**Figure S1.** Genetic map of pop1.

Supplement: s1 [file s1]
